# Supplementary material for: Mosquito diversity and dog heartworm prevalence in suburban areas
Source: PubMed Central journal article supplement (PMC6953185; doi:10.1186/s13071-019-3874-0), 2020-01-10
Supplement: 13071_2019_3874_MOESM1_ESM.pdf [file 13071_2019_3874_MOESM1_ESM.pdf]

## **Additional file 1: Text S1**

### **Modified DNA extraction protocol used with the DNeasy Blood and Tissue Kit (Qiagen, Venlo, Netherlands)**

1. Homogenized sample in 170µl Buffer ATL. Added 30µl Proteinase K, mixed by vortexing, and incubated approximately 60-72 hours at 56°C. Vortexed for 15 seconds before proceeding.
2. Followed steps 2-7 as written in the Quick-Start Protocol.
3. Eluted DNA by adding 50µl dH<sub>2</sub>O, incubating at room temperature for 1 minute, and centrifuging at 8,000 rpm for 1 minute.
4. Repeated elution as outlined in the previous step for a total eluted volume of 100µl.

### **Modified DNA extraction protocol used with the ZR Genomic DNA-Tissue MiniPrep (Zymo Research, Irvine, CA, USA)**

1. Homogenized sample in a solution of 50µl 2X Digestion Buffer, 50µl dH<sub>2</sub>O, and 5µl Proteinase K.
2. Incubated approximately 36-48 hours at 55°C.
3. Added 250µl Genomic Lysis Buffer and vortexed. Centrifuged at 10,000 rpm for 1 minute.
4. Followed steps 4-6 as written in the Solid Tissue Protocol, using half of the listed reagent volume (i.e. 100µl DNA Pre-Wash Buffer in step 5 and 200µl g-DNA Wash Buffer in step 6). Transferred the spin column to a new microcentrifuge tube.
5. Eluted DNA by adding 25µl DNA Elution Buffer, incubating at room temperature for 2-5 minutes, and centrifuging at top speed for 30 seconds.
6. Repeated elution as outlined in the previous step for a total eluted volume of 50µl.
