# Supplementary material for: Mosquito diversity and dog heartworm prevalence in suburban areas
Source: PubMed Central journal article supplement (PMC6953185; doi:10.1186/s13071-019-3874-0), 2020-01-10

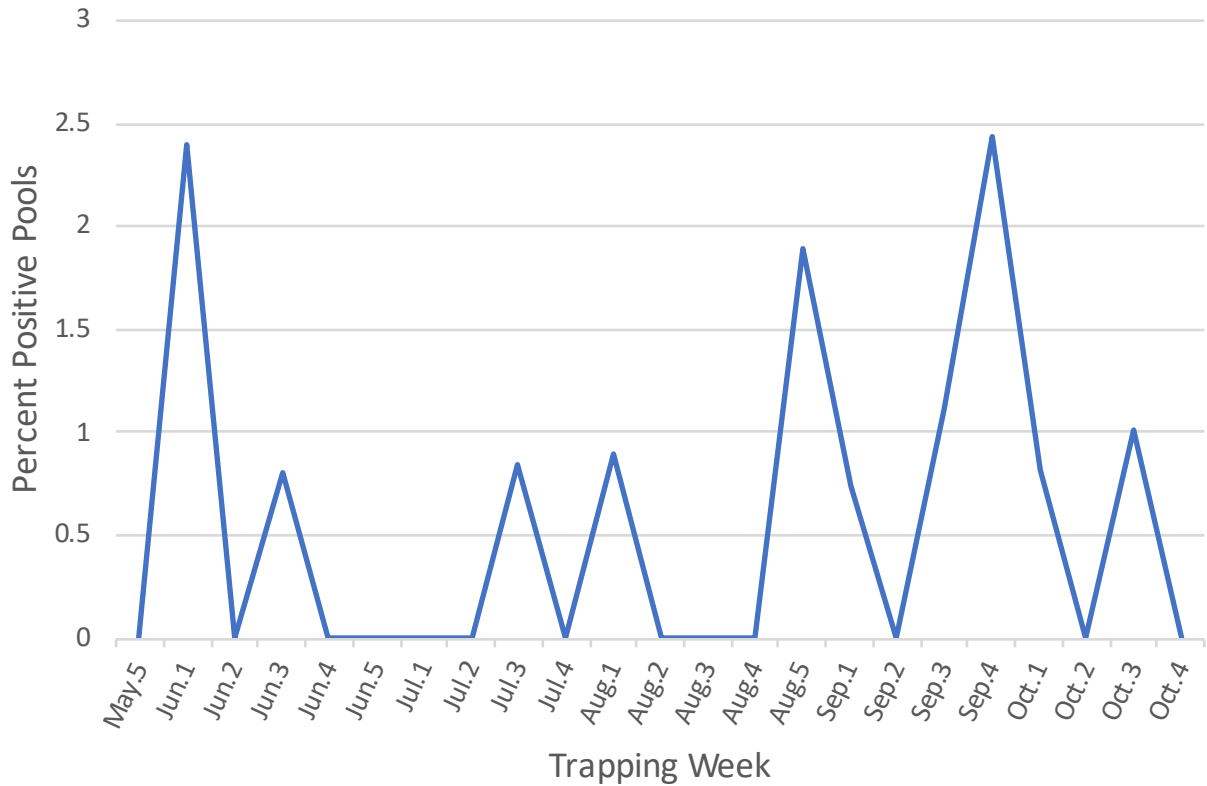

Supplement: 13071_2019_3874_MOESM2_ESM.pdf [file 13071_2019_3874_MOESM2_ESM.pdf]
